# Supplementary material
Source: Springer Nature journal article supplement (https://www.springermedizin.de/resource/supplementary/12889_2007_1188_MOESM3_ESM.pdf/9502646)
Supplement: MOESM3 [file 9502646]

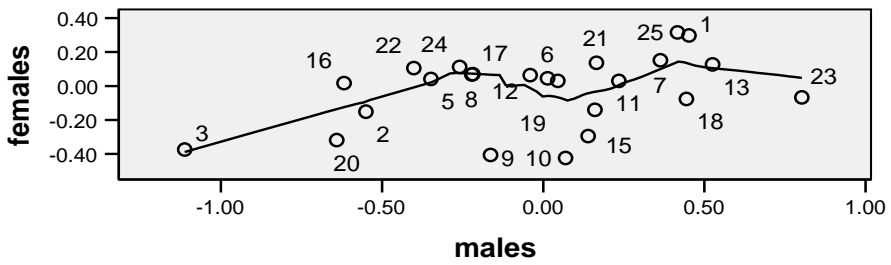

A

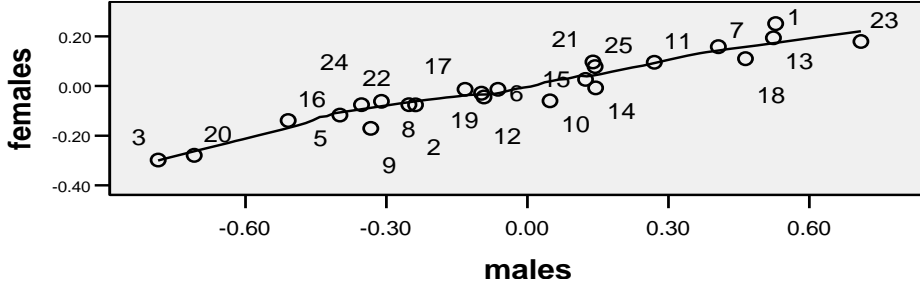

B

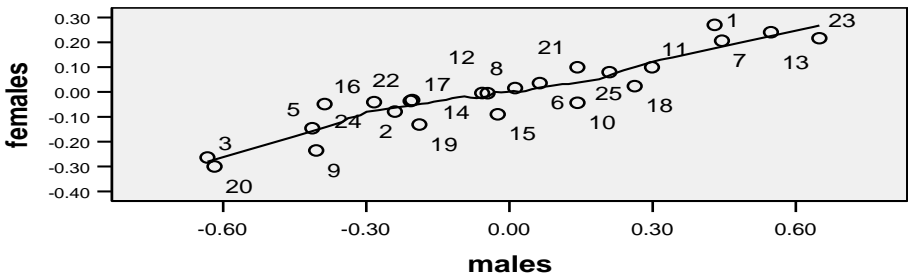

C

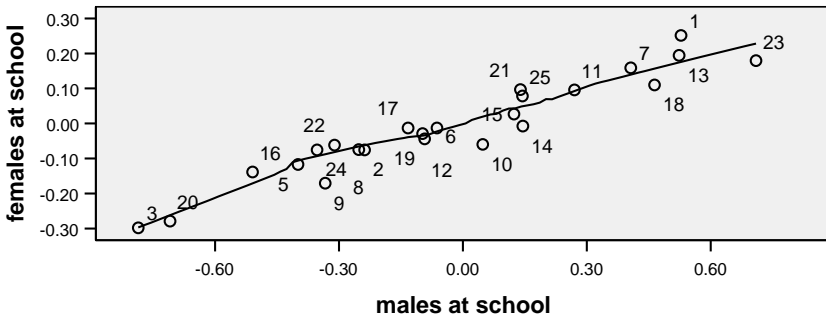

D

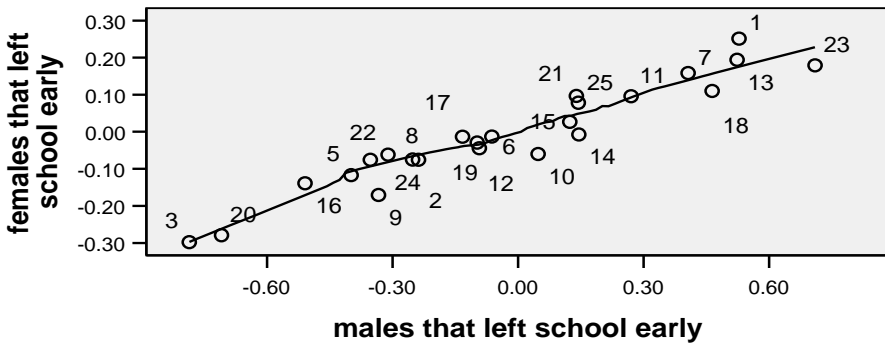

E

### Information applying to all of the plots above

Standardized residuals have a mean of zero and a standard deviation of 1. The lower the standardized residual the more effective the school is in reducing smoking after adjustment for prior predictors of smoking. The circles represent the schools and the numbers are the study identifier for each school. The lines through each graph represent the trends of the data (Loess fit lines to fit 50% of points and Epanechnikov kernels were used).
